# Supplementary material for: Contribution towards a Metabolite Profile of the Detoxification of Benzoic Acid through Glycine Conjugation: An Intervention Study
Source: PLoS One. 2016 Dec 1;11(12):e0167309. doi: 10.1371/journal.pone.0167309 (PMC5132330; doi:10.1371/journal.pone.0167309)
Supplement: S2 File — (XLSX) [file pone.0167309.s002.xlsx]

## Sheet: Sheet1
				Bin:	1	2	3	4	5	6	7	8	9	10	11	12	13	14	15	16	17	18	19	20	21	22	23	24	25	26	27	28	29	30	31	32	33	34	35	36	37	38	39	40	41	42	43	44	45
				Bin no:	9.99	9.97	9.95	9.93	9.91	9.89	9.87	9.85	9.83	9.81	9.79	9.77	9.75	9.73	9.71	9.69	9.67	9.65	9.63	9.61	9.59	9.57	9.55	9.53	9.51	9.49	9.47	9.45	9.43	9.41	9.39	9.37	9.35	9.33	9.31	9.29	9.27	9.25	9.23	9.21	9.19	9.17	9.15	9.13	9.11
Batch	Sample Name	Case	Treatment	Time
1	F41-1	F	Vehicle	-1	252890	171823	163215	116642	119619	115441	154683	155425	146413	136626	126331	144808	119435	180993	176359	144357	146470	243128	221481	149679	114737	100843	78257.5	97814.6	144370	200495	201496	159355	158899	121434	156779	494791	232072	237721	237794	273226	742045	166458	139760	159717	196656	186653	223183	905997	295073
1	F410	F	Vehicle	0	151299	100954	86908.1	77923.6	111461	103155	92055.1	80274.3	139882	97880.7	92923.2	131341	104316	109864	84170.6	127086	148779	159230	147041	127133	137871	126601	104426	81357.1	92131.8	102784	154894	108437	111395	121164	103571	235388	149600	135990	161820	482378	375103	144193	115648	92562.8	173866	124331	143894	501161	175055
1	F411	F	Vehicle	1	79268.9	105579	95048.8	116859	125177	105559	105436	140893	96276.4	110185	81200.6	78683.4	86898.8	125441	134186	97194.7	158830	90428.4	140876	88535.5	130721	84982.8	113483	134016	62372.1	67643.2	119821	87716	105112	124401	149700	125210	127733	118947	212231	286018	203263	115179	139938	83166.2	152091	118921	114206	210160	134831
1	F412	F	Vehicle	2	84927.8	101751	127028	99983.2	104678	79112.1	108185	61520.2	102389	97539.5	99862.3	124958	72093.9	152500	80338.5	79635.6	129216	115689	108830	139565	59743.5	91859.2	123565	94014.7	79539	94326.2	89616.3	85530.1	109012	106297	95233.1	89298	86302.3	87859.9	88926.4	206031	85582.6	98921.7	95398.4	112593	101452	80975.1	116557	96101.5	117117
1	F413	F	Vehicle	3	74747.9	144057	47937.6	66173.5	83446.3	81359.5	76957.4	88031.1	76786.6	97547.3	86477.8	63788.6	52972.6	105833	121047	89978	78801.7	98579.1	81691	50863.7	65219.9	94652.8	79493.1	100599	79891.6	97106.7	95617.1	77679.9	74124.9	121882	81253.5	70453.2	94356.6	82335.9	84545.5	209081	98167.4	63639.2	87660.3	81160.6	78495.4	81140	79177.9	146025	104486
1	F414	F	Vehicle	4	67488.7	70025	68237.6	53384.6	67932.5	114733	104107	83480.7	79788.3	66609.5	77375.7	80464.8	78503.2	69467.5	102575	101471	88058.8	99162.6	93956.4	81895.6	99133.4	71135.3	72344.9	54629.6	62604.5	58968.5	86904.5	90931.2	85671.6	56313.2	115070	120975	71919	68945.9	100020	286620	85197.5	75524.8	88363.5	71679	61787.4	109957	100164	134472	67723
2	E51-1	E	Vehicle	-1	120268	125438	123531	110108	108009	105200	166187	162632	123756	79992.9	107153	139166	212174	225622	181911	149627	184619	158930	177877	134148	115998	150503	132508	63973.3	117393	98749.7	136363	148219	108838	113541	101761	242485	147712	178511	225222	869075	753344	120863	87729.6	117832	109746	165179	147163	1.30271e+06	184238
2	E510	E	Vehicle	0	206636	142868	112930	98741.7	104517	84949.8	143451	150580	167500	112456	102618	147137	230238	224743	178172	150491	107699	239440	136857	166422	123171	118176	94405.4	119452	145528	113327	142858	107816	188328	110455	127650	208192	166829	189543	211435	1.26385e+06	1.46684e+06	122018	106304	147396	130824	131440	152049	1.06401e+06	214641
2	E511	E	Vehicle	1	106838	97280.7	132239	125895	109304	85660.5	143157	116474	167453	109125	155373	92979.4	182151	170941	166626	121859	79318.7	160254	156360	157702	109983	144108	85797.9	85535.8	102868	120424	114833	129304	119493	119025	126191	199203	163619	200835	153893	721372	841423	127274	120286	125089	167399	115533	142853	717194	173771
2	E512	E	Vehicle	2	88524.7	110966	92268.4	70996	70741.6	111004	90686.2	62030.7	66449.1	110490	124532	66444.2	118346	76241.3	105420	70245.7	83459.4	77410.2	78521.8	89561.6	98706.1	93641.7	54880.2	85327.3	75680.8	91103.3	88852.5	83058.1	76155.1	90564.9	95582.5	116076	67050.1	82837.4	82573.7	385115	110377	81399.2	84504.2	95655.9	68901.4	101957	67349.6	197816	67666
2	E513	E	Vehicle	3	101024	97107.3	59599.6	141117	100298	97647	83708.9	137788	85333.1	85485	114976	83516.6	122766	122628	155134	111338	83796.8	97842.6	120372	103090	124208	72431.2	140182	79870.8	94477.6	93166.3	97056.8	119048	115558	119244	120423	136240	106889	121672	114857	606691	180155	100079	96448	116926	81340.7	103172	183093	202882	99625.7
2	E514	E	Vehicle	4	134875	93287.6	67920.9	71562.2	92634.1	93729.5	97448.4	95645.3	101348	115546	103306	116717	113277	157118	148824	139707	91489.5	149263	159090	135057	136852	160160	109569	113595	118500	127134	102137	80535.1	110926	125130	62215.9	172362	134572	164004	137556	1.16895e+06	415787	155974	123467	135567	137274	169045	112887	370635	104533
3	G41-1	G	Vehicle	-1	183045	110148	92701.2	155217	116430	158845	160255	152208	159625	93536.8	127182	144165	210570	234303	239418	177716	136376	230263	251030	129542	117644	119894	132818	84255.2	97827.9	105016	130473	142129	150759	159966	94915.4	281977	185014	215201	253589	576074	856640	160278	129527	184212	170589	166353	199900	2.37544e+06	381330
3	G410	G	Vehicle	0	220505	134573	99752.4	138210	153626	99847.6	125465	223772	178784	106962	111004	167227	206378	340296	285479	210927	169164	261985	306875	137813	147255	124198	110471	144057	139480	98238.6	120751	125145	185660	161847	156892	282820	236962	240935	232238	611204	2.58325e+06	144189	149870	154658	170284	177215	241845	1.66554e+06	537746
3	G411	G	Vehicle	1	229916	116230	130475	148604	144740	147920	182054	248882	230853	167059	154558	141274	181883	280431	304095	280753	205328	310131	389127	215099	190741	171955	139286	127840	155209	201096	154583	158117	125582	199938	192479	243560	351522	260878	266573	270523	2.45261e+06	277949	160537	228604	259955	224591	255639	629885	1.31212e+06
3	G412	G	Vehicle	2	224151	154063	134187	132926	87623.5	177373	158653	152861	191829	116476	129967	144972	253086	371998	243363	149133	170761	228135	266448	166264	131318	184652	189000	145330	158325	169528	165174	138896	213223	162186	112267	300732	298061	234588	257927	248821	2.11284e+06	206229	216630	220312	187936	177297	180070	1.12008e+06	629905
3	G413	G	Vehicle	3	117225	138746	90622.5	139901	143872	78000	128694	108741	116781	102291	120580	120789	87795.9	210971	162791	152158	79482.3	146862	178738	118541	120247	113690	99639.2	110266	121747	137209	120742	131219	167805	126073	121657	201607	201559	158294	164620	591123	507879	106927	112965	127124	142649	188231	183504	695458	206048
3	G414	G	Vehicle	4	112805	82270.9	72010.4	74894.1	90247.5	60944.1	95993.5	126123	102090	88223.5	103801	145914	116962	138369	167878	119011	103706	80721.1	87085.1	114710	102646	94692.2	71568.6	115156	92632.8	94286.8	120934	74798.5	104943	77134.4	110216	143509	130708	156105	150957	374815	121584	94330.7	103100	126522	75254.7	91511.8	111069	256292	126878
4	B41-1	B	Vehicle	-1	191282	118287	136309	133045	135548	122354	156071	197943	156796	107618	114757	179960	200847	361796	283876	187866	85252.7	195799	211600	172301	96563.9	166178	130013	111094	119056	132130	168981	136601	130252	164359	140053	362843	212518	255949	253215	481083	721542	144786	174380	171043	168703	163507	226579	1.65218e+06	344636
4	B410	B	Vehicle	0	159452	176252	127327	136535	107785	115509	134612	133270	135930	112970	135723	121700	140136	207809	209792	137278	152681	174119	196142	127242	174421	169809	131450	140540	122627	112403	168215	134100	204161	129404	146020	254291	237285	192402	233579	478970	644826	184989	119777	160411	164559	161509	138474	968274	325396
4	B411	B	Vehicle	1	172998	141394	110254	118771	143677	114548	85302.6	111428	124673	106951	124065	148022	116522	197237	181310	155772	138266	172212	128270	137511	161512	134992	125666	107040	135001	144571	120530	109484	127390	133231	120083	179805	157211	177604	202965	373231	335746	100421	194887	203830	165365	100680	142685	496027	274346
4	B412	B	Vehicle	2	99542.1	100345	122243	108348	78256.6	104703	97989.3	120738	125579	95518	136152	94884.9	153204	142871	76310.3	106071	77915.2	107070	118503	140695	117780	75117.3	74581.2	86012.5	87920.7	99442.6	81846.5	121893	113911	121939	101657	124816	164353	128159	140609	280199	73657	98926.8	112548	65644	114518	71250.7	93081	227951	102477
4	B413	B	Vehicle	3	112351	133973	93369.8	117529	62466.1	108800	94075.1	71169.4	91261.3	126550	131113	110880	123764	96301.6	133438	145098	92432	131424	134094	112924	141840	108709	91521.1	87913.9	104856	109451	111334	112595	132361	108759	79601.5	144214	132598	89270.4	154442	309270	160026	109523	91306.5	58845.3	120592	103516	125959	256990	127824
4	B414	B	Vehicle	4	89446.2	118806	75213.2	65164.2	103536	109626	80952.8	101582	92753	104629	76632	120299	115611	122297	125210	129989	81862.6	116785	132940	120403	92834.8	86512.3	73911.7	81554.3	102158	137527	67874	94584.9	86809	91837.8	102808	127222	132368	122741	169785	449950	198799	109652	117943	132210	85006	91922.5	87180.7	294481	89508.6
5	N51-1	N	Vehicle	-1	217246	119773	169721	131416	127775	109760	152315	217867	159913	84764.8	97819.4	135991	150088	190298	191458	167953	174694	178863	216273	114879	139273	149593	147944	122398	106504	68600.7	104638	155118	170272	102878	182747	453448	175730	247057	230284	678580	489501	137435	143597	136267	144523	155889	182425	2.8798e+06	275820
5	N510	N	Vehicle	0	190059	128269	135000	101888	131820	129220	111175	232508	152088	88083	111086	142378	191653	222344	190444	157827	157478	233385	185133	155924	126688	206879	127877	97457.3	131407	127085	137276	114626	156650	135742	182592	234022	194369	240908	250436	774960	1.05702e+06	142526	154584	144435	187392	191062	170047	1.86553e+06	254526
5	N511	N	Vehicle	1	93999.4	108426	147858	116586	79875.2	136186	111072	108549	83187	116378	110424	90652.1	127103	128356	144388	119628	84406.2	159788	144184	112707	156630	128321	116354	92943.9	103267	128920	164213	105505	143479	117513	126481	153894	153366	154283	184800	429327	406269	107313	129522	111778	108797	114731	143106	681314	148495
5	N512	N	Vehicle	2	64022.5	62327.6	69174.1	56367.3	76282.7	80474.4	87333.1	73012	70818.7	75615.4	75741.1	71514.2	76632.5	111696	92703.9	84928.7	82181.8	67379	54694.4	76312.4	74312.2	77179.7	75179.1	66138.9	60149	83383.1	85913.2	98267.2	93240.2	61149.7	92625.1	107675	68940	83315.8	56891.9	168998	65264.2	83413.1	78192	55552.9	106889	74576.9	113688	120336	64930.1
5	N513	N	Vehicle	3	67462.4	84639.4	76731.2	99432.1	80077	92660.8	87687.9	81300.6	107760	81307.6	94238.1	66219	95410.9	93447	77090.5	88281.8	91552.3	80587.1	80090.3	73822.1	70614.1	83958.8	77112.5	87288.8	93689.6	113698	70285.8	91926.3	91489.6	93396.4	58191.9	60509.4	62450.9	69288.4	84132.3	250421	98473.9	73802.4	68466.4	78720	89019.8	79228.9	41807.6	96851.7	65940
5	N514	N	Vehicle	4	89992.6	113348	73464.8	57785.4	105612	87187.8	95346.8	87475.2	102138	90684	107775	118644	91899.6	52506.5	44923.5	74557.1	83743.2	114830	73963	96212.3	77529.1	110144	90300	97948.2	61181.3	76004.1	75365.5	101303	84346	81850.2	78247.3	119957	101133	99231.8	93820.4	410878	113937	102142	86895	128518	93623.6	118005	93933	186065	110943
6	L51-1	L	Vehicle	-1	163469	135519	135032	126927	147619	163365	113645	143310	135216	133480	128961	146997	106984	155140	124616	144123	145608	159314	197118	112115	127471	157079	125617	125373	119940	177138	131601	129520	178302	171147	166311	303728	227254	185028	264252	632651	500686	199060	149919	152275	339315	216171	240555	5.93701e+06	804355
6	L510	L	Vehicle	0	130651	103898	99008.1	98125.8	98415.7	97168.7	100786	100239	113741	138907	106470	129054	127504	140538	123191	154107	96953.4	140954	141481	153515	139796	122269	115338	88363.5	118033	106516	122249	154820	96281.7	127273	148538	208409	161755	168357	204084	946591	385345	152694	140364	154196	150452	171354	263755	4.72801e+06	587376
6	L511	L	Vehicle	1	74650.3	63354.2	94966.6	73942.2	62669.8	58262.5	71388.1	86075.3	80450.5	89030.4	72915.4	90863.8	85341	82846.2	70133.2	62853.9	69717.7	107562	85304.9	91219.6	67760.7	75664.8	85727.2	79312.4	79793.1	56195.8	94080	70995.4	85914.6	60207.1	100532	113710	103352	91327.8	104906	242487	90080	74735.9	79418.5	86736.1	98776.1	110186	110678	807663	149725
6	L512	L	Vehicle	2	133342	108143	56769.4	103846	81574.7	83099.2	86822	74730.4	80696.3	63511.9	90956.6	133849	65581.9	117369	92753.6	91269.6	74304.4	125369	105443	116558	95178.9	90439.4	108726	112051	118042	103037	100767	101153	80623.9	93064.7	103714	87585.1	70340.1	137496	71222.5	168217	103966	98102	51796.9	81510.7	101486	109242	116625	432826	137678
6	L513	L	Vehicle	3	78785.3	107869	83198.4	98728.2	73784.4	123460	71405.3	76646.2	136732	91512.9	71317.1	51227.4	131546	86161.6	107006	119132	60585.8	73560.7	87074.6	73002.9	68436.1	78101.4	77722	78323.5	77468.7	64840.9	100136	65718.2	94708.1	85457.5	78493.9	109253	86413.5	103742	94783.7	176732	76354.7	113877	97810.2	80218.9	83427.7	107847	111627	376908	152124
6	L514	L	Vehicle	4	115883	83601.3	87238.6	70690.9	63951.5	100724	110693	77150.8	116483	73351.5	84271.7	73132.7	83722.3	71392.3	62747.9	90817.4	117206	88649.5	79523.3	87550.6	98302	67335.3	106263	105263	81481.5	85860.1	98838.9	64699.2	85052.5	91358.7	76709.2	73337.3	94591.3	78514.8	66775.5	273859	82335.3	111107	66287.3	72783.2	86171.6	82349.9	86851.3	463475	176359
7	D41-1	D	Vehicle	-1	122912	106123	110381	88547.8	125899	88205.5	106315	208303	114101	117461	131153	141970	171802	206319	197025	157732	142322	268702	213181	179496	150470	117797	121599	119303	110615	152427	131953	116455	182299	174610	183005	291370	145335	207719	241984	543139	500850	148941	197241	213928	165221	186915	198467	1.87387e+06	243317
7	D410	D	Vehicle	0	154070	68313.6	111764	134951	117818	101736	111876	162718	126203	113612	76254.5	130323	148665	172375	163753	108761	154808	278697	254652	157058	129920	115498	91976.1	107878	120836	103294	149776	115021	145217	175085	189001	284850	132700	234624	204355	513586	465037	131476	141286	149399	181414	129745	166011	1.81678e+06	251941
7	D411	D	Vehicle	1	145313	115014	103635	139265	128634	147454	120053	137136	131045	124541	116235	112051	138848	181139	133983	149122	106486	224370	254764	111862	116470	80854.9	128241	105765	91739.2	117451	112832	104349	105918	148362	120629	235682	208654	178368	175066	384459	772844	144894	138037	168579	161962	143807	219715	1.04232e+06	364340
7	D412	D	Vehicle	2	89530.4	98114.7	104310	116668	103083	94721	93015.1	96946.1	98405.6	115281	99631.7	85042	96242.9	89296.5	74179.9	93585	137236	89543.9	103713	94479.7	99030.3	115848	85749.6	87767.7	97674.7	89833.5	99883.4	109557	132384	110542	81534.8	105807	108911	111215	133866	267778	86036.9	137173	79381.4	79302	131494	80274.9	104088	286335	99664.6
7	D413	D	Vehicle	3	126426	84352.4	67480.3	98198.1	92024.5	88974.4	68164.2	114476	79368	86171.5	70556.3	90210.2	91250.1	69930.6	122449	109659	74598.2	117100	73148.3	88302.9	83468.4	98255.3	88685.4	81841.7	72345.7	97806.8	69452.1	66769.2	58843.5	88890.8	77351.1	106739	79761.4	94989.4	70520.5	147877	80229.3	108830	76879	93358	77589	80076.5	70695.4	144557	81122
7	D414	D	Vehicle	4	98660.8	140678	111040	105272	88736.8	93100.6	104062	130050	64936.2	76039.1	59203.2	110029	87939.2	101833	106873	100189	83035.1	88846.4	135021	64685.2	65819.9	88642.9	98284.2	118322	104654	84320.3	72114.6	110349	108789	90286.8	70914.5	99064.7	117928	91809.8	97092.4	179794	113959	153914	89966.3	96715.6	82383.7	102713	96484.8	141230	115754
8	J71-1	J	Vehicle	-1	INCOMPLETE, URINE SAMPLE NOT COLLECTED
8	J710	J	Vehicle	0	INCOMPLETE, URINE SAMPLE NOT COLLECTED
8	J711	J	Vehicle	1	INCOMPLETE, URINE SAMPLE NOT COLLECTED
8	J712	J	Vehicle	2	INCOMPLETE, URINE SAMPLE NOT COLLECTED
8	J713	J	Vehicle	3	INCOMPLETE, URINE SAMPLE NOT COLLECTED
8	J714	J	Vehicle	4	INCOMPLETE, URINE SAMPLE NOT COLLECTED
9	T21-1	T	Vehicle	-1	75320.7	85990.3	130633	125166	102676	115104	119204	123891	151360	119266	133713	186919	138538	180502	129520	124088	146227	169674	129156	137420	117690	131395	102549	131275	140592	146419	105977	152852	115400	128260	120441	154315	102703	142057	203013	875043	887576	153378	208638	160911	190327	165845	166022	1.85474e+06	699317
9	T210	T	Vehicle	0	177562	147751	140099	157767	197305	169569	129681	303186	199742	122393	195752	237505	288064	413198	403773	262529	192934	367148	466952	216128	218937	198910	216722	165359	222706	223639	204325	226167	259249	236166	281733	311941	387005	301598	392901	468939	4.89357e+06	399851	376463	311979	295819	347815	400507	1.55086e+06	2.87074e+06
9	T211	T	Vehicle	1	160595	181650	145774	151558	216304	205882	174479	237147	192814	174572	207895	211789	199700	278865	288371	281825	214207	288487	335462	220343	149593	200338	250440	208226	246959	203791	232161	202310	220834	240037	242900	264055	291739	292716	282482	332953	2.75548e+06	325344	215680	240146	259565	336848	332706	960817	1.73316e+06
9	T212	T	Vehicle	2	105334	89479.6	80244.7	75973.8	70743.5	84597.1	64234	134287	122712	85071.1	66416.6	94813.1	73006.6	100728	95941	106059	58361	92302.5	90815.4	98635.7	90896	89883.1	84017.7	91739.3	97785.4	79135.3	76524.3	81517.4	112012	95786.3	94668.2	137883	84714.6	117615	101433	229672	82753.2	72913.3	62468.9	69168.1	99470.9	112260	107054	168125	149161
9	T213	T	Vehicle	3	73100.3	99046.4	105751	79333.7	112797	116626	76381.6	76680	87611.6	132269	127443	123716	125867	172874	89780.3	148885	116327	81044.5	176395	111266	106258	105501	120293	137775	103970	138310	98394.8	138236	167471	124107	118533	159110	144490	158726	141423	661192	265052	119316	167180	143151	115798	122890	124609	486679	292996
9	T214	T	Vehicle	4	81414.2	101818	87728.3	100859	91002.5	82616.3	126173	145169	75033.3	107751	129850	104343	93146.7	83619.8	89365.1	137064	117545	122311	110493	114859	111189	92619.6	86854.8	151793	99485	134555	89063.5	118741	122568	73657.6	124640	110317	124791	117744	116962	343179	97897.6	91730.4	121389	87297	125754	90660.6	78543	281135	173544
10	W61-1	W	Vehicle	-1	119728	96129.3	138934	99248.6	100811	110824	120670	168851	151692	112688	125853	127062	135909	129711	153252	94742.8	117278	157717	113879	117536	152210	119237	97935	127952	103108	72602.7	127354	132426	98267.5	67385	124423	206919	153435	264015	192320	808417	349765	108337	151859	100504	154535	108665	96421.4	452755	156412
10	W610	W	Vehicle	0	109410	130676	117098	105088	80161.6	109669	117547	141016	122563	128996	123433	139321	150997	147021	171055	116405	103341	108484	88025.8	101407	116563	110147	124809	93184.6	153752	128936	85850.1	67548.3	134389	113184	100974	161499	170566	207332	145306	810153	493553	86962.8	123222	119229	110378	109918	162760	330822	140871
10	W611	W	Vehicle	1	81589.1	78742.6	100302	89809.7	96322.8	123579	110448	97693.2	72441.4	93375.2	128045	99580.5	92371.8	104438	91920	111252	89001.8	78440.8	75713.6	62273	96746.6	74257.5	92144.4	86371.4	101151	142938	98656.8	82973.2	93156.8	89478.7	87423.7	76267.3	104261	114141	49935.5	278707	144575	96403.8	73403.8	82083.4	78701.1	97156.5	89249.8	120382	119749
10	W612	W	Vehicle	2	70657.3	79773.2	59729.5	83196	93885.4	93572.1	105508	78846.5	64620.6	78306.3	77986.8	75364.7	77306.3	135726	96088.2	67577.3	105886	69167.9	75680.7	72498.2	117704	95623.6	55332.4	72737.1	85186.8	56793.6	99576.9	93657.8	90337.6	68093.3	81092.3	75068.2	70963.7	96201.2	92096.5	158978	94890.8	67683.6	97146.4	50892.1	84914.1	85271	91554.8	84223.1	98508.9
10	W613	W	Vehicle	3	91442.7	93424.5	85639.2	107822	58519.7	96315.5	114572	93176.5	80576.6	98811.9	95060.6	123441	112420	85550.9	113639	79978.2	76007.6	78786.4	89162.8	106596	100387	70312.1	79132.5	56206.6	69674.1	116828	98243.8	125509	105994	85377.2	103328	79803.5	111386	84356.2	85734.8	211528	93424.4	107008	85768.1	107439	112693	143416	113713	90662.1	103849
10	W614	W	Vehicle	4	57671	86456.3	66334.7	68356.4	84053	92305.5	77258.2	101800	65340.7	71830.5	89927.2	49254	71307.5	100899	60048.3	73056.4	78089.3	134228	85058.7	53522.8	47865.1	78289.2	67988.1	75843	78441.2	80115.5	62268.7	90594.2	67183.5	71417.2	71258.5	51429.6	74859	100254	67645.8	172967	106380	71398.4	88233.6	103998	64454.4	70079.9	86619.6	74187.3	76622.4
11	X41-1	X	Vehicle	-1	119603	140625	76342.2	96396.4	98109.1	121317	88283.3	109802	119454	136089	98235.5	126122	97810.7	118306	106830	92338.7	164255	157522	196104	105157	95514.5	118473	131495	116334	143051	110049	128614	124287	172820	111257	105106	270820	168115	126486	170109	708011	186173	125546	112445	170429	137985	135865	153586	1.40206e+06	153722
11	X410	X	Vehicle	0	147540	104053	119319	107348	98758	110748	123847	135480	107581	95651.1	97649.8	88471.9	106231	139034	131796	129589	124852	142875	126704	126185	102495	71257.3	98095.6	135062	88742	143000	156708	111491	88585.4	107421	127818	190078	133203	92197.8	136477	973980	158774	110579	84803.1	140030	108007	148050	89070.5	759461	117803
11	X411	X	Vehicle	1	147978	99099.6	87953.1	75936.8	85116.6	73890	88695	100764	95815.7	75128.7	128503	127210	128592	112128	103470	176605	120855	149055	99315.7	76991.8	115762	98641.8	119600	88394.2	99336.7	79609.9	111365	106454	112602	108834	117539	139954	122851	162750	165131	453636	156786	94381.3	113273	107771	101845	113215	153786	403874	110751
11	X412	X	Vehicle	2	79012.2	87820	71230.7	91378.3	65922.9	104342	78772.1	86101.3	89752.6	62838.8	64010.6	81893.8	96736.8	99405.6	84806.4	100381	80905.8	76185.4	96471.1	74339.2	78388.4	87019.5	75710	75535.5	63147.2	94682.5	114903	67949.9	91077.4	67809.3	62250.2	108502	109200	69472	111042	143588	74282.7	88027	92685.2	80076.6	77542.3	68545.7	59721.8	112900	61214.2
11	X413	X	Vehicle	3	82544.3	74529.8	64875.7	56954.2	86248.3	66316.5	118790	62483.5	68489.2	63436.6	81783.4	66614.3	80803.7	70924.3	86117.5	76063.3	86170	73375.8	61366.2	78203.3	82898.9	73318.9	106856	69901.8	85086.1	78105.7	72709.6	80204.3	100727	78466	61374.9	76394.4	74132.7	80422.3	88501.3	178524	80915.6	83818	76435.2	71465.3	77547.7	85663.9	59218.4	130491	75222.1
11	X414	X	Vehicle	4	72250.8	74494.8	100310	58108.8	86530.4	133579	104874	90241.3	59973.2	119655	135495	45160.6	98869.7	92983.5	118446	86181.3	84081.9	103977	127650	98761.9	86764.6	96997.6	97470.2	62954.9	78691.4	70184.3	59661.9	89213.2	88124.7	89047	137648	79973.2	79157.4	66639.3	101013	275832	90515.3	106968	111103	107243	115577	99560.2	108026	194855	111849
12	S21-1	S	Vehicle	-1	83804.5	101677	117854	109938	82690.7	97629.7	80132	106581	98289.6	132498	139459	122822	92054.5	92133.3	118603	114401	119262	90661.8	90999.9	113795	111892	120907	108171	87241.4	96083.2	101801	94122	116659	110551	158599	90364.1	189134	126522	185034	101316	207278	251454	119308	89743.7	134947	147374	93637.1	86659.8	750218	236368
12	S210	S	Vehicle	0	136424	109011	108364	74165.3	106573	125945	130213	98279.3	85691.6	135355	116931	137462	144638	154358	137438	117644	141148	191675	181061	167563	123421	162472	99098.9	135995	121225	92364.4	101002	89805.3	125990	167973	130790	223319	212463	209030	169924	242644	365440	167100	187508	151055	176157	134382	171147	777323	309528
12	S211	S	Vehicle	1	78473.1	76737.8	88038.7	80080.1	106433	102502	73121.2	69335.6	72076.2	62674	73812.6	80188	114855	101636	97973.4	93543	116656	94125.6	110561	110933	70972.8	57305.5	74771.5	77315.8	92735	65514.6	80537.3	89222.7	104852	81057.4	118764	105062	108700	73740	50838.9	85803.8	141845	77188	53755.8	84573.3	97651.5	80229.6	93226.8	160763	79425.8
12	S212	S	Vehicle	2	63320.1	104798	81905.2	66560.5	60994.3	59710.9	118045	78849.2	125994	67009.2	92429.6	66455.4	74406	67168.1	53559.4	82013.9	79731	110666	70352.2	72276.4	53558.7	73263.2	74910.3	67895.9	64941.8	77159	67864.3	83932.5	73267.2	85492	76346.2	54936.4	65556.9	122927	98063.3	111931	108593	82305.6	82776	75992.9	85510.2	74969.6	82858.7	134805	63574
12	S213	S	Vehicle	3	102804	80349.3	93391.9	75043.9	100187	119260	92913.4	110151	100783	127843	84212.2	77038.7	81021.4	95077.9	93932.8	80890.8	112178	109025	70422.9	85636.7	84270	98392.6	70561.4	75107.2	89445.7	79496	91461.6	86050.5	93756.4	109704	84016.2	142891	115660	94570.3	77002	204407	155518	82449.6	112865	112355	67008.8	99934.4	104108	242874	95242.1
12	S214	S	Vehicle	4	104296	106402	76430.8	82250.7	110490	97174.5	117722	92527.8	90651.9	97290.1	103966	97395.6	88728.7	93495.3	98318	96834.5	74138	100230	120615	93071.1	123335	77799	110678	117268	83685.4	82772.5	117406	85613.2	94295.2	99004.5	79839	109121	126363	112246	105389	246749	100300	103350	66236.5	107218	126245	97562.2	74762.3	278830	143466
13	Q21-1	Q	Vehicle	-1	151316	109990	84712.3	129550	145273	118062	125077	145531	110215	114990	111733	109776	131713	140085	168829	131867	101788	173776	228413	118506	162301	139888	108456	120472	121346	118514	91985	101592	178544	133935	149597	216923	131205	169247	158305	937487	367730	104047	165441	175323	160645	168502	156569	2.15004e+06	257753
13	Q210	Q	Vehicle	0	110046	119772	128862	131364	109542	113453	117532	178050	124912	101494	149095	96550.8	117485	163485	186992	146294	148864	174774	193171	127466	135145	125101	178570	143041	133981	112940	162200	144624	152315	153606	167756	248349	200510	170106	201424	1.09656e+06	423675	172068	148451	153485	177280	186998	183192	1.3984e+06	250772
13	Q211	Q	Vehicle	1	134290	106845	81213.9	61950.4	100550	79730.9	79892.6	66499.5	75255.3	107187	67838.4	91606.8	101851	102483	76532.8	105984	62544.3	103543	111689	108452	83332.1	124005	105505	78946.8	90061.5	105256	124699	93916.5	89504.9	81021.1	51439.3	115404	87100.9	78645.9	106675	323227	75560.3	152654	75814.7	94205.7	129679	93668.5	94287.9	331481	132011
13	Q212	Q	Vehicle	2	96471.6	105496	74453.6	66317	83573.7	97490	86146.8	89814.8	88806.4	91214.9	111591	74210.3	81214.1	91483.3	82783.1	85027.9	113004	87081.5	97948.1	80339.5	61907.9	141470	105227	87091.6	106566	93672	82860.7	116836	58932.7	84152.5	61961.1	113288	114017	92215.9	113394	215270	114386	124458	124210	94388.1	92083	114174	80617.1	133960	86948.6
13	Q213	Q	Vehicle	3	90183.7	92180.4	82126.8	105191	101247	95281.2	107736	85697.7	104015	82477.3	86457	94967.4	102803	107901	102067	112507	103194	114732	134432	105641	77807.7	93708.5	102963	77955.6	98767.3	108974	79160.9	70054.1	98608.7	112058	64769.1	134991	94988.8	86092	105936	399900	94253.8	75418.9	138875	108700	86114.6	99411.5	90874.3	272131	109249
13	Q214	Q	Vehicle	4	71192.9	46226.8	105524	94576.5	64621.1	76422.7	73581.2	88538.5	70544.7	105486	100357	86349	102722	97083.1	71248.7	87722.7	98330.3	70874.4	96632.6	84634.3	94284.4	78270.7	92167.7	72850.9	84975.9	66523.7	81353.9	92429.4	104417	111389	87378.7	91732.1	94326.4	118101	84024.1	196052	97243.5	94745.2	64505	99261.6	88032	97766.2	120473	129022	97224.7
14	I41-1	I	Vehicle	-1	153506	116855	160499	87309.7	102093	136743	178465	171430	148511	117004	120087	105213	125732	151708	178955	180500	98647.5	228729	255737	122183	133305	130524	122961	111358	125136	127629	145015	137966	192419	136148	149403	387228	261341	218993	268112	735042	521075	207667	163544	187795	200490	182599	222491	4.13645e+06	363738
14	I410	I	Vehicle	0	106959	147671	139317	95534.9	112089	130077	95501.3	148558	137269	104059	154879	128608	133667	149935	163980	149461	92456.5	144931	245281	135879	86062.4	139580	111891	126466	114198	92376.8	120522	91378.2	117997	158786	113251	177772	179967	155642	155800	638531	222259	127975	104973	161546	139042	135817	132475	1.96882e+06	231036
14	I411	I	Vehicle	1	118805	122169	78918.2	118361	96631.8	84610.7	136464	134174	98765.5	121497	111134	118823	112070	129660	167210	124424	131483	182504	231297	133958	92391.7	107126	126418	145410	134058	120289	134902	156891	139305	150467	172715	223653	170014	156783	167172	358586	461840	128694	134743	180938	143691	169070	161946	1.31964e+06	359348
14	I412	I	Vehicle	2	98888.1	85152.8	71555.4	66865.6	98530.1	139257	112960	113692	56287.4	78128.2	83369.9	107909	93300.6	92002.8	107002	94748.4	92193.1	132547	91992.8	113343	128164	78288.1	101539	98887.1	116452	157093	91147.7	112169	105793	76837.6	128659	109084	80723.7	121782	140762	154957	86820	109420	90412.3	122575	100897	116323	84420.8	272012	120177
14	I413	I	Vehicle	3	109747	80242.8	52018.1	76643.8	62931.8	71759.7	64493.7	74579.7	61226.2	95674.2	68794.5	123220	81246.5	115730	87106.3	83706	66149.4	96726.1	78836.9	72182.1	117523	82913.7	74614.2	80206.9	84080.5	111654	86456.1	98597.4	96783.9	70151.8	91408.8	65700.8	97309	75335.8	67343.8	152606	94738.7	86700.8	90210	97784	101252	112990	81797.9	245864	85621.4
14	I414	I	Vehicle	4	86186.7	68154.3	103187	81895.8	72723.9	94098.4	71208	77394.5	89214.6	69090.7	83809	99194.8	78761.8	50807.6	99136.5	97871	96715.1	98849	106115	92789.7	81698.2	98219.8	115649	95443.7	94415.9	78669.6	111858	70861.9	56276.2	81120.9	81818.2	108808	112612	78781	84347.1	201089	119491	112326	91077.4	114252	100199	89107.5	95265.7	227589	105522
15	K51-1	K	Vehicle	-1	142942	165762	89819.2	101719	134987	105974	128226	190262	155033	146273	81230.5	149370	178678	250622	193361	245519	184199	230642	163957	156345	108364	144843	119563	95413.9	104535	120317	167716	120144	206734	138301	168850	231999	200235	252796	201126	722545	630784	118423	151525	111761	203129	175332	139918	988505	173920
15	K510	K	Vehicle	0	153169	140387	106894	86847.6	103857	137382	162745	292271	122274	139371	160424	141931	208403	266097	213221	173452	164615	255190	229612	142264	101450	172676	116802	110114	139009	117764	147591	111512	133433	163115	136664	191216	149878	270266	217513	1.19154e+06	1.24914e+06	111279	165319	195083	194582	144744	150801	616433	232423
15	K511	K	Vehicle	1	93623.9	115494	65162.5	108412	121498	100222	86374.6	131351	143030	137379	135382	143801	119066	198544	145905	148043	95108.6	134956	120231	119078	152547	129280	117526	112304	89298.6	139115	108697	155256	133904	142303	151407	124531	152688	251557	178017	616584	678331	136738	133961	111088	160016	146290	152286	333711	168318
15	K512	K	Vehicle	2	92467.2	86304.9	89444.1	69626.5	141546	72979.3	121298	63056.7	103222	90552.4	118490	93690.5	99449.8	103919	79421.3	150613	119193	90246	77452.8	103422	121322	85356.7	92002.9	133779	67427.1	109414	124235	84553.9	91852.1	83755.1	89011.4	112245	81736.4	148033	125156	380401	110087	87799.9	74695.2	109094	110831	73391.9	114044	149000	129775
15	K513	K	Vehicle	3	73737.1	93706.2	91457.2	117622	86118.2	72033.4	94276.5	101606	88319.5	75682.5	88216.3	111073	134748	161035	145391	118145	104442	103414	119045	117589	106908	85359.4	127425	108581	102242	120685	102198	97469.8	84371.7	122238	84174.9	163888	118310	101676	82813.7	743366	197677	70572.4	85181.2	116974	140273	100180	146462	204970	77744.2
15	K514	K	Vehicle	4	89078.4	88167.4	85806.8	81532.7	86191	101076	107002	99962.6	58278.6	57757.8	129993	83882.3	90542	154981	93348.4	102660	117759	103310	102158	82688.6	86062.1	74629.9	76233.3	74916.6	87823.2	99103.8	104449	89421.3	124565	79207.3	75494.3	87243.3	110244	100648	63588.8	264140	88715.8	92714.2	60814.8	93914.2	73059.1	72622.3	96662.4	83398.5	106265
16	M61-1	M	Vehicle	-1	208154	183319	105138	100986	123701	164404	191486	273584	148575	124986	94812.1	94052.6	111042	213178	196212	147146	121383	250235	285588	177928	138843	116928	83522.8	126646	132297	123959	141675	74994	98788.1	143259	106644	177508	180292	248543	212497	202731	1.02866e+06	148208	185314	142538	156073	183976	191937	1.80353e+06	612794
16	M610	M	Vehicle	0	142927	104890	100609	85985.2	87076.3	101507	92096.7	183348	136701	98437.8	114317	111382	157480	194460	164415	148937	164810	201346	229177	126194	118537	98446.3	112770	130353	113914	120659	113877	114291	98434.3	134106	102898	174337	152298	196669	149939	406472	433821	142055	125257	121565	156658	161394	123767	1.31356e+06	262164
16	M611	M	Vehicle	1	125667	97562.2	71044.5	128132	109360	86520.3	136000	175873	165313	150383	134921	117278	100228	161742	194775	163745	117537	205060	229899	139128	108812	117507	76331.8	143171	191273	123948	164492	102710	104222	133094	93373	165608	160450	233622	166529	206273	776676	176114	141006	202123	152501	123462	130034	603464	500204
16	M612	M	Vehicle	2	107966	88955.7	80639.6	66652.2	125643	75852	82738.9	129537	131613	85157.9	122544	92969.4	100584	138071	102174	119959	107970	120502	105142	85045.1	116605	88745.7	88218.7	136244	83264.1	134500	119106	108377	110992	129815	95567.2	128879	123279	122063	148909	550104	179993	161764	136096	132644	95145.9	106356	132607	535993	149114
16	M613	M	Vehicle	3	87571.9	116731	88369.7	93296.2	90463.8	116009	124068	87309.2	70142.1	105635	94761.1	83459.5	87157.6	110720	79164.5	105255	96184.6	78622.4	87664.7	53226.1	74981.3	99867.5	92447.5	90923.3	55911.5	99915.4	100308	84553.8	65075.3	105956	87887	100098	101741	94857.9	106552	276043	107639	118717	83202.1	101302	86818.5	81752.8	108292	220717	98230.1
16	M614	M	Vehicle	4	114173	144426	105570	76179.4	115525	74351.9	124337	85451.6	111916	131936	105712	111051	106050	100308	144906	134667	135459	105386	126462	111420	130123	86533.3	100951	72797.6	100057	95694	87752.8	128588	108059	140357	140794	99660.3	205461	157070	186757	513460	164622	118708	119647	135036	172275	127595	170712	401062	123559
17	P21-1	P	Vehicle	-1	156704	125823	155880	126104	164929	128529	136630	162169	92141.2	113283	121210	108850	134703	169766	180058	150984	137840	111248	164758	121918	113496	124111	100277	107101	136468	127790	143734	192786	173599	154158	151075	302157	159524	181021	193855	1.25523e+06	884454	129554	160137	217560	196816	171978	225445	1.14883e+06	256308
17	P210	P	Vehicle	0	143226	104390	114576	140819	117761	101205	98107.2	127345	127147	141034	112450	136755	146970	214338	197907	171944	159194	161300	192831	143697	114242	118488	127315	122428	174587	133176	146497	155677	204285	204652	138807	193923	174593	266084	253200	1.38344e+06	1.20035e+06	175739	168907	128468	169542	144158	214711	1.20093e+06	335247
17	P211	P	Vehicle	1	119365	68698.7	106613	89165.5	118203	106579	108144	109107	74489.7	78610	130668	102516	118548	133632	204211	147168	128460	111252	138265	146317	109325	144158	135085	102275	122710	143330	117293	104662	127375	144879	105228	157320	129620	186539	196953	751238	557327	153542	140352	114748	119662	144586	173489	733453	204252
17	P212	P	Vehicle	2	68253.6	125368	69595.7	87170.4	98525.6	82021.8	101665	136790	64139.9	117594	75035.4	80323.5	82806.4	104317	92459.3	94079.5	99862.7	118339	116219	93837.6	122193	61373.3	66679.9	112977	102884	115230	94238.4	111002	103542	131888	76921.6	107287	104509	65872.7	92988.2	300205	105363	101703	103256	110146	106661	78700.3	163010	268547	65582.2
17	P213	P	Vehicle	3	87348.6	93265	98392.9	70259.8	97176.7	69285	95477.3	96348	106731	70685.6	85668.1	86426.1	125192	127838	113191	99054.4	104629	71217	103703	118750	105828	84272.6	84112	58423.2	70453	71820.1	65191.2	139776	72081.9	69372.7	153725	99334.1	88287	89984.3	141608	398450	100460	63319.5	77003.6	108704	158258	105079	66022.7	248305	84068.9
17	P214	P	Vehicle	4	77388.5	98760	145130	109812	105113	98600.4	96420.9	106264	87385.4	99893.9	107545	126485	94878	91670.1	95040	100855	99803.8	122658	111908	133481	125964	106811	100810	74359.2	74702.5	118588	117200	110712	130250	123448	84475.8	88665.6	140838	132029	88420	285301	77315.6	159120	99467.7	108206	121572	95975.1	102804	142243	113761
18	U61-1	U	Vehicle	-1	121417	120448	121748	137923	103278	140549	149448	172628	148747	129314	169711	185797	307630	408687	294383	191474	174450	241452	212984	144477	166122	162785	100193	119637	184123	138731	137861	166220	196934	215589	169026	410205	319265	231752	302238	882700	2.22501e+06	132175	148017	193947	260838	203837	277321	4.79804e+06	517591
18	U610	U	Vehicle	0	128521	121353	128116	143008	180710	116811	110096	165231	154118	123874	151782	190401	298994	423598	357658	249386	173121	258609	268313	170489	125012	145242	143981	149883	132083	120105	155142	149386	150106	212672	122547	245990	274723	264703	289644	676063	3.97491e+06	219444	183203	238496	226669	173205	276282	4.22966e+06	801156
18	U611	U	Vehicle	1	103860	133753	100030	122181	103384	107346	103856	105608	156069	165231	111882	122520	144460	218151	170315	141633	132947	129385	207745	144881	106201	124328	78166.7	125376	134400	92876.1	132561	118992	158484	122283	129541	147735	183114	243253	158099	752938	902356	126457	147170	175754	145298	125038	165495	1.6933e+06	337443
18	U612	U	Vehicle	2	79299.2	73955.2	71997.8	93666.6	87447.3	89650.4	104191	127922	100530	119732	67718.2	93372.1	88337	109233	100298	112765	101513	117201	113666	105736	88149.5	103466	113487	74305.6	122711	81284.7	107441	91912.8	110003	89678.2	110672	118808	101665	101711	122531	567282	89100.7	119775	139039	96790.5	89396.5	97231.2	97086.4	473390	124821
18	U613	U	Vehicle	3	78203.2	53239.7	61912.2	78017.1	73133.7	63348.8	73505.4	80689.2	64487.4	64469.2	63176.7	66246.7	67782.9	68036.4	71019.2	74828.7	76031.3	59378.8	67454.6	101735	75354.6	64277.4	49899.3	59409.7	61020.5	54904.5	75814.5	83818.6	69077	67419.8	74832.7	69385	78919.5	71541.7	66075.2	392485	98134.8	51131.9	60899.4	66250	63084.2	70230.1	70902.4	315410	83287.6
18	U614	U	Vehicle	4	81798.7	105085	97761.8	120600	117237	103006	104992	93812.3	125543	108694	94816.8	130448	110635	164253	87767.6	115485	113729	93014.1	82471.8	63471.1	104145	133364	81794.3	116010	88712.9	79720.4	109816	129457	117027	92058.5	92626.7	104438	144129	123907	144705	702425	131540	144286	80673.7	85146.8	100979	116705	94931.2	541567	124661
19	H51-1	H	Vehicle	-1	83385.3	79346.9	74447.5	110427	95725.2	125450	92254.8	116496	70151.1	105583	83440.8	104200	62174.5	105161	107216	109375	115479	118321	89395.3	125176	96652.5	124972	82429.2	89318.3	95225.2	89059.4	108530	86410.4	117632	104001	90301.5	110316	108726	120895	124040	222983	109584	108946	106435	94080.6	108342	97751.8	112073	657779	110962
19	H510	H	Vehicle	0	97676.8	146430	68734.1	118045	93660.7	105546	102410	98684.4	100737	96412.8	90993.5	104945	121067	99565	90704.7	87864	58852.5	65522.6	89490.9	69202.9	96216.8	86299.5	94323.1	108870	85787.4	77748	120190	89287.7	90846.8	68830.8	68035.4	109847	119548	139200	98350.6	352841	116181	107811	98361.2	104936	69231.9	60363.5	82392.8	718267	127939
19	H511	H	Vehicle	1	90587.6	96918.5	78982.7	82661.9	73315.4	85128.5	121509	92584.7	110340	85089	90476.2	75810.9	102089	71522.8	135958	89997.5	67942.2	89875.5	81697.9	118461	85626.3	70478.6	81816.9	109914	64055	86250.4	77917.6	113235	99390.4	106533	81630.8	76289.6	91256.5	109857	108416	134142	89642.9	100568	72737.8	117865	79310.9	80896.7	77118	261007	102330
19	H512	H	Vehicle	2	67006.6	48572.5	62977.6	79927.8	61623.4	75459.4	100414	94198.9	82232.3	104614	65204.8	71097.9	57163.4	75176.2	68705.8	59166.7	87098.9	93120.5	66231.1	76470.1	96280.1	76828.1	75021	80848.6	69251.2	69321.8	75285.9	107957	85687.8	92275	78077.4	80507	89407.8	65709.9	57493.1	93285	76755.3	71631	74126.2	72763.1	76544.3	67220.3	84285.5	131799	90771.9
19	H513	H	Vehicle	3	69906	94843.9	93561.5	86258.5	78263.6	87629.5	74261	56639.3	61468.8	95572.4	99363.5	84348.4	88386.9	64122.6	60349.9	67807.2	94046.9	84893.2	73071.5	79998.1	66291.1	48021.5	85661.3	76635.9	70041.3	96726	80091.7	81969.2	76388.7	77372.9	51094.9	101926	58707.8	77328.9	57370	124853	57858.3	68215.3	67789.3	72135.5	83993.9	64758.9	80400.9	148540	81605.5
19	H514	H	Vehicle	4	102372	130749	84096.6	66841.8	108233	90227.4	70736.7	92038.4	82352.9	59483.2	104494	94807.1	74130.5	70979	83414.2	85795.2	98388.2	53907.5	59299	85566.7	86630.3	81839.6	57964.3	72530.3	104420	101305	101820	81164	81365.9	83062.5	105527	114065	81387.9	87299.4	81534.7	147435	51274.1	82306.8	66363.6	86874.7	89014	82185.2	106611	140557	81855.7
20	A11-1	A	Vehicle	-1	123992	128721	137193	99283.6	86800.7	77816.9	89816.8	213528	104374	109943	123570	147693	126824	194118	131505	128213	154056	204637	195167	125703	87505.8	106519	70725.7	149261	94861	144587	89732.2	135514	105376	99579.6	70749.6	128851	129561	105856	167755	552041	303645	115179	154705	117046	160878	117103	156569	468618	115760
20	A110	A	Vehicle	0	85633	84714	94618.4	117219	131199	112467	109505	150905	137184	129619	97458.6	117477	139152	151221	180910	153504	128977	197576	223305	124553	146795	78299.8	96278.1	108637	127005	113762	98193.2	145301	112699	126908	176017	209848	121381	131830	162497	541376	314120	109741	137982	121888	119509	137252	117561	356417	113756
20	A111	A	Vehicle	1	108691	140329	97309.4	93128.9	102170	77169.6	84701	115427	115301	150556	99758.6	113538	107922	114988	140448	140716	107877	123617	155136	115503	84019.9	94913.3	97567.4	102014	77949.7	96821.6	82789.2	60911.8	104346	153740	93162.5	86219.5	175491	89535.7	140026	315158	100729	110416	94734.9	117921	89655.1	105087	95214.5	171085	100595
20	A112	A	Vehicle	2	83532.7	72961.3	69708.7	75715.6	64684.6	61003.5	94318.1	72064.2	75136.6	63742.2	79707.2	129009	88420.7	63860.5	93812.2	63486.8	77202.9	90708.6	99051.1	68427.6	71943	98748.1	89969.4	81698.8	70923.6	79795.7	82493.9	69340.6	61727.6	62980.3	59968	72654.2	67895.4	56844.9	70397.6	122583	92980.2	66617.3	60211.6	82260.4	56770.2	69085.4	120235	91718.9	101466
20	A113	A	Vehicle	3	62355.9	147118	52242.6	68862.1	83061.4	74102.6	60330.2	74795	92466.5	92029.2	90048.3	97974.2	105579	78541.3	71821.8	97725	68226.6	63386.7	108825	82947.7	91506	103480	80298.3	107547	123991	97971.9	68085.9	63296.9	116668	93914.7	82249.9	100697	77117.9	63803.5	86716	161442	58601.6	81584.3	95030.6	69363.3	54035.5	69661.5	80387	84026.5	92041
20	A114	A	Vehicle	4	101251	59996.3	84288.3	88547.9	94941.4	76662.3	105173	81842.5	99352.1	56562.5	95722.1	84115.8	95268.2	101934	88001	99604.8	76717.4	61093.9	106402	129750	80882.1	78507.4	102415	94633.7	88573.9	130427	90832.3	84324.4	138547	84293.7	89125.6	96127.5	100811	102882	89917.6	236947	92855.9	111304	125187	60468.1	87276.6	91328.2	81380.5	164818	77600
21	C61-0	C	Vehicle	-1	208889	120125	134685	101425	93463.9	107494	186539	328288	157109	159220	135740	131708	153377	285676	250128	215292	195208	372582	343689	167362	126641	169212	102921	141266	92895.2	128940	133734	102984	141996	171299	167778	222819	191098	271775	275844	319279	1.96073e+06	163527	138762	117761	233568	124310	179557	2.76895e+06	1.08734e+06
21	C610	C	Vehicle	0	214490	107987	115959	126516	167653	115590	139547	298974	175713	138486	143484	152102	173865	332522	272725	222778	220549	392936	377943	163898	151158	114104	173419	112902	115299	113338	187437	163216	191882	213752	178459	242026	251058	265875	277185	420808	2.29051e+06	159445	191394	201649	267261	234242	225652	2.8089e+06	972087
21	C611	C	Vehicle	1	96650.2	91242.2	100710	117322	79992.3	138920	125337	170212	82909.4	167820	157512	125287	164212	181777	151079	170889	154332	158353	262632	160198	157187	135357	101596	103197	114179	114330	128682	128880	103617	115498	118390	149088	177183	215051	213403	333925	1.43509e+06	147371	136324	133454	157151	146644	126955	1.13211e+06	691104
21	C612	C	Vehicle	2	109612	77645	88471.5	80985.7	79092.8	75727.9	95827.5	62984.5	130498	67333	78532.4	80215.6	90108	111194	111170	88307.6	65287.5	75645.2	95856.4	107951	104649	101315	91225.9	89907.4	91937.8	100891	90978.3	63093.7	65888.5	87564.4	72728.2	115462	96524.1	104384	92525.5	214997	115279	71395.4	79087.4	105135	110097	96062.6	103673	177336	106391
21	C613	C	Vehicle	3	119241	111496	85090.7	85602.5	84841.1	71631.1	71612.5	89408.4	89446.7	76782.7	82439.7	158651	88877	104034	90508.4	104481	124481	84888.4	96494.4	114400	143892	79410.5	115255	96924.6	84867.3	109356	130116	73879.3	109856	106606	115505	119290	102208	119537	113051	597638	138533	80652.4	103525	105114	119473	111920	127498	364660	125845
21	C614	C	Vehicle	4	93078.2	98660.7	105591	99690.1	93954.3	78285.7	107385	67116.3	80869.9	95386.6	96555	106259	74192.8	145694	72708.1	83811.6	104140	69969.6	112968	90410.6	69221.5	103162	105824	111251	86396.4	78860.7	88953.9	65476.9	81428.9	87004.7	109391	126947	84647.4	95234	66691.1	262239	103491	83855.2	87101.4	105514	98128.6	119380	101317	98623.6	91364.8
22	V31-1	V	Vehicle	-1	122813	63424.9	82632.3	85940.6	79660.8	112599	111862	94976.9	115044	114517	117440	82913.6	144583	130741	105045	95143.5	100461	115906	136914	84380.8	99179.6	105676	74402.9	95761.2	77170.3	87885.8	115502	112219	92157.3	100763	71330	132657	104468	129995	91103.1	394746	138796	102731	117926	106891	150090	110115	138321	671589	100918
22	V310	V	Vehicle	0	126381	141418	87856	106510	147445	94500.2	98682.4	119002	131366	135307	85670.2	108976	132807	177577	196477	135143	90840.6	150637	130050	109047	138077	108714	133539	123610	119907	66581.3	132382	106558	127591	122124	134503	171383	142496	161326	128247	733667	369268	122319	95036.3	162604	127783	121685	132405	937608	191297
22	V311	V	Vehicle	1	121406	63195.6	91147.9	99694.3	83401.1	91494.2	83092.1	88633.1	67814	90959.3	90435.9	78356.9	98780.6	82125.4	76478.8	125426	68668.6	94075.1	103872	111557	110046	130779	121180	61705.3	85570.2	122494	70927.5	73621.7	96036	71145.6	69060.4	92755.6	122831	109550	136076	262060	134365	114202	106311	84695.2	134239	105534	88437.6	307251	94547.2
22	V312	V	Vehicle	2	97782.5	61980.3	74302.4	87032.3	102884	57543	91985.9	83925.7	92311.4	116335	90863.1	75955.5	104312	85422.4	87314	74453	71236.8	96772.6	115137	73409.6	82246.4	92440.8	65292.9	106433	79724.5	74238.2	125120	82282.4	106643	86564.7	87650	84111.7	93799.7	75678.2	86956.3	179257	128973	82027.3	103116	115782	121539	87663.9	78839.9	148686	133951
22	V313	V	Vehicle	3	89513	80350.4	100284	100425	68202.8	62544	76756.1	71088.3	95293.1	87096.5	83985.1	58669.3	99486.6	60114.4	113311	73976.2	70335.7	56875.3	67767.3	88541.2	66799	82618.9	82047.8	91561.3	81194.7	97898.6	74641	67408.6	88994.8	107432	89373.8	65249.2	103288	57713.9	70582.5	160543	79380.3	82955.7	73178.4	76894.1	79490.2	80623.1	77903.9	174569	85418.8
22	V314	V	Vehicle	4	84100.8	80733.7	102896	61552.9	65773.2	93793.9	86349.3	74792.6	91794.4	83009.4	97158.7	68707.1	79041.5	80498.6	87615.9	80823.6	68063.5	76173.6	97059.3	51900.3	97123.5	67478	76438.7	96964.5	77013.3	93647.6	71392.8	84543	74824.2	89397.6	90907.3	69463	94592.4	75029.6	94207.9	186823	91407.5	84077.9	110631	118389	103803	100738	87530.1	126614	88993
23	O21-1	O	Vehicle	-1	127737	130640	113280	116555	107506	117122	155836	122347	172962	161344	128773	169472	176171	239662	220275	188458	132833	209709	219458	152757	115657	107813	136920	132303	138621	138465	152021	148427	166016	197604	136591	312910	177043	266724	196034	694623	1.30276e+06	190415	190345	148702	202867	163743	164957	1.18623e+06	266184
23	O210	O	Vehicle	0	158061	105883	135649	123416	113116	133460	123826	157957	131462	136553	127855	79596.6	172777	206664	197171	146373	154122	193377	131356	134113	154533	129153	145959	123363	169308	128225	138087	189000	222754	159973	143637	334457	209432	222965	188654	919187	924677	180635	124355	174022	113710	139236	202141	1.08901e+06	186675
23	O211	O	Vehicle	1	119278	86685.2	118471	100256	101248	111136	97677	97887.9	58821.8	116981	111360	74887.4	112374	90634.3	96487.3	129462	93808.1	89978.8	115836	89418.4	84440.6	86786.9	93298.9	87167.2	84872.9	92393	109014	73953.9	126932	101661	125177	114376	91258.9	103814	103343	239684	95514.5	92099.8	142458	85590.3	110959	82714.2	104913	221626	78140.3
23	O212	O	Vehicle	2	115133	92738.2	93652.2	113235	48493.7	100241	130690	117271	87479.2	104099	89392.9	68058.4	73257.9	98970.5	88985.2	119582	95220.2	94971.7	72896.3	100908	89393.3	96178.3	87401.8	100156	95348	112440	120004	100155	125570	100207	80849.5	66628.4	86196.8	74509.6	127142	219658	121212	75527.2	72746.4	90935.8	85595.1	85221.8	113910	196330	102013
23	O213	O	Vehicle	3	91691	69058.7	82932.5	94643.9	80688.6	69320	62798.2	79985	112089	93779.1	107223	75728.5	117985	71547.4	104591	62414.3	86638.9	72084.4	79176.6	93640.2	76370.8	102706	75071.3	88947.7	84916.5	78717.7	88993.1	106765	79253.5	100013	108935	93293.4	104794	132319	110361	266079	88894.9	60053.3	88689.2	95003.1	117858	85428.1	91172	223891	80431.4
23	O214	O	Vehicle	4	85073.8	71979	94772.7	98052.4	82927	83083.6	85501.3	51747.5	66674.4	106139	93443.8	78408.4	129946	99422.8	71465.9	68193.2	120453	85365.8	67375.7	87120.2	112667	94458.3	80261.3	85676.4	71562.8	71239.8	54513.3	100434	99071.5	94037.8	134743	106402	104463	64099.5	101763	249982	66630.9	79444.1	74693	88855.8	68910.3	82889.2	58428.5	151176	114920
24	R21-1	R	Vehicle	-1	139304	125692	69850.4	83660.1	92980.9	85112.1	114340	97244.5	85474.9	108061	92812.2	87817.7	123998	150084	132078	148081	120224	152642	159491	85055.5	96343.6	104258	102324	103825	104725	90286.7	130314	113020	107060	102545	137368	162644	138706	167583	326416	1.49936e+06	504748	102411	108058	202354	142591	89321.1	142915	3.11063e+06	172892
24	210	R	Vehicle	0	131277	117886	132654	107385	71562.3	106373	141998	114908	78800.1	81774.5	126664	129060	132050	154874	183049	169791	119954	160737	192326	123077	83304.4	92900.6	113837	120469	92745.9	103675	129536	103390	129926	126423	136124	195189	148424	202004	349341	1.33158e+06	537309	159147	140654	123769	140954	167957	163529	3.15644e+06	282322
24	211	R	Vehicle	1	170574	143474	132865	94798.1	136041	159881	85768.1	131643	161895	185415	93843.4	145675	165863	170133	194002	217615	159266	226871	233039	137959	113593	113864	136059	127820	128675	146270	111339	138847	178858	172974	127699	197356	145066	170039	393914	920422	1.0978e+06	153509	152483	149439	207020	167429	162010	2.81039e+06	453516
24	212	R	Vehicle	2	94135.9	98983.7	135614	68826.9	68408.9	110192	79847.4	70365.7	97728	96908.7	142338	76354.2	125909	100469	88864.2	90981.2	82564.5	119061	82037.2	94415.5	97968.5	109154	125786	87250.5	118247	122202	86408.8	116209	97244.7	112032	121267	106764	134516	92382.5	150696	495120	98710.5	107448	92866.5	91624.8	127902	123167	124460	831482	127811
24	213	R	Vehicle	3	125822	85800.3	109904	65399.7	88330.7	89634	66101.1	72243.3	80580	91489.5	81820.3	77932.8	85861.3	82657.2	80162.6	79896.8	76009.6	75900.2	74274.1	75665.8	78426.7	83549.2	75081.3	69554.4	78549.3	68891.4	89556.8	86587.2	90512.4	86426.7	103598	108624	111971	130890	141628	251453	111282	66428	124252	85227	101735	83276.6	88252.1	483918	109805
24	214	R	Vehicle	4	127600	112439	131952	74060.1	95817.2	85995.8	114851	88024.8	77363	106560	101944	100756	64592.4	92074.3	106923	104439	89822.4	87334.9	115624	81815.8	65994.8	109484	92317	89394.4	98702.3	98454.3	115982	69353.7	82751.3	111073	95832.3	135065	86809.1	107980	172352	330000	137996	145305	128366	85069.5	88028.2	127726	135010	545069	118442
[truncated: 422 more columns]
