# Supplementary material for: Contribution towards a Metabolite Profile of the Detoxification of Benzoic Acid through Glycine Conjugation: An Intervention Study
Source: PLoS One. 2016 Dec 1;11(12):e0167309. doi: 10.1371/journal.pone.0167309 (PMC5132330; doi:10.1371/journal.pone.0167309)
Supplement: S3 File — (M) [file pone.0167309.s003.m]

%==========================================================================
% NMR DATA - VEHICLE PAPER 
%==========================================================================
% Load data
 load CINMR_RAW.mat;

%--------------------------------------------------------------------------
% DATA PREPARATION
%--------------------------------------------------------------------------
    % Set detection limit
        Raw1=Raw;   
        Raw1(Raw<2000000)=0;
    
    % Normalize wrt Creatinine
        C1=find(strcmp(Bins,'B_4.07')==1);
        C2=find(strcmp(Bins,'B_4.05')==1);
        C3=find(strcmp(Bins,'B_3.05')==1);
        CREAT=Raw(:,C1) + Raw(:,C2);
        Data=Raw1./repmat(CREAT,1,size(Raw1,2));    
        Data1=Data;   Data1(:,[C1, C2, C3])=[];
        Bins1=Bins;   Bins1([C1, C2, C3])=[];
        
%--------------------------------------------------------------------------
% QC ANALYSIS
%--------------------------------------------------------------------------
    iQC=find(strcmp(Treatment,'QC')==1); 
    QCData=center(log(Data1(iQC,:)+1));
    
    % Perform PCA using PLS Toolbox
        PCAOutliers(QCData,'QC',0.9,num2cell(Batch(iQC)),3,'');
    
    % Evaluate scores and Hotteling's T plots to identify & remove outlying batches
        idrop=find(or(Batch==2,Batch==3)==1);
        Data2=Data1;    Data2(idrop,:)=[];  
        TR=Treatment;   TR(idrop)=[];
        T=Time;         T(idrop)=[];
        B=Batch;        B(idrop)=[];
    
%--------------------------------------------------------------------------
% DATA PREPARATION 
%--------------------------------------------------------------------------
    % Select vehicle data 
        i2use=find(strcmp(TR,'Vehicle')==1);
        USE=Data2(i2use,:);
        TR=TR(i2use);
        T=T(i2use);
        B=B(i2use);

    % Remove Variables with 50%+ zeroes... 
        dat_1=USE(T==-1,:);
        dat0= USE(T==0,:); 
        dat1= USE(T==1,:);
        dat2= USE(T==2,:);   
        dat3= USE(T==3,:);    
        dat4= USE(T==4,:);
        USE2 = [];   Bins2 = {};  outmets={};  z=0.5;
        for c = 1:size(USE,2);
            if ((sum(dat_1(:,c)==0)/size(dat_1,1))>z)&&...
               ((sum(dat0(:,c)==0)/size(dat0,1))>z)&&...     
               ((sum(dat1(:,c)==0)/size(dat1,1))>z)&&...
               ((sum(dat2(:,c)==0)/size(dat2,1))>z)&&...
               ((sum(dat3(:,c)==0)/size(dat3,1))>z)&&...
               ((sum(dat4(:,c)==0)/size(dat4,1))>z);
                outmets = [outmets; Bins1(c)];                
            else 
                USE2 = [USE2 , USE(:,c)];
                Bins2 = [Bins2; Bins1(c)];
            end;
        end;    
    
    % Scale
        USE3=center(log(USE2+1));
        
    % Reset Batch numbers    
        fixB=B; 
        fixB(and(B>1,B<8)==1)=B(and(B>1,B<8)==1)-2; 
        fixB(B>8)=B(B>8)-3;
    
%--------------------------------------------------------------------------
% CROSS-SECTIONAL 
%--------------------------------------------------------------------------
% The Compare2 function calculates:
%   i)   Univariate statistics using the statistics toolbox
% 	ii)  PCA using the PLS Toolbox
%   iii) PLS-DA using the PLS Toolbox

    i2use=find(or(T==-1,T==0)==1);
    t1='-1';  t2=' 0';     
        Compare2(USE2(i2use,:),USE3(i2use,:),USE2(i2use,:),...
                 str2cell(num2str(T(i2use))),...
                 t1,t2,'b','c','s','o',...
                 str2cell(num2str(B(i2use))),...
                 Bins2','Vehicle',...
                 0.9,0,'yes','between',1,1); 
    
    i2use=find(or(T==0,T==1)==1);
    t1='0';  t2='1';     
        Compare2(USE2(i2use,:),USE3(i2use,:),USE2(i2use,:),...
                 str2cell(num2str(T(i2use))),...
                 t1,t2,'b','c','s','o',...
                 str2cell(num2str(B(i2use))),...
                 Bins2','Vehicle',...
                 0.9,0,'yes','between',1,1); 
    
    i2use=find(or(T==0,T==2)==1);
    t1='0';  t2='2';     
        Compare2(USE2(i2use,:),USE3(i2use,:),USE2(i2use,:),...
                 str2cell(num2str(T(i2use))),...
                 t1,t2,'b','c','s','o',...
                 str2cell(num2str(B(i2use))),...
                 Bins2','Vehicle',...
                 0.9,0,'yes','between',1,1); 
    
    i2use=find(or(T==0,T==3)==1);
    t1='0';  t2='3';     
        Compare2(USE2(i2use,:),USE3(i2use,:),USE2(i2use,:),...
                 str2cell(num2str(T(i2use))),...
                 t1,t2,'b','c','s','o',...
                 str2cell(num2str(B(i2use))),...
                 Bins2','Vehicle',...
                 0.9,0,'yes','between',1,1); 
    
    i2use=find(or(T==0,T==4)==1);
    t1='0';  t2='4';     
        Compare2(USE2(i2use,:),USE3(i2use,:),USE2(i2use,:),...
                 str2cell(num2str(T(i2use))),...
                 t1,t2,'b','c','s','o',...
                 str2cell(num2str(B(i2use))),...
                 Bins2','Vehicle',...
                 0.9,0,'yes','between',1,1);   
   
%--------------------------------------------------------------------------  
% Repeated measures ANOVA
%-------------------------------------------------------------------------- 
% The RMAOV1_mvr function performs one-way repeated measures ANOVA and 
% is a slight variation of the original RMAOV1 function:
%       Trujillo-Ortiz, A., R. Hernandez-Walls and R.A. Trujillo-Perez. (2004). 
%       RMAOV1:One-way repeated measures ANOVA. 
%       A MATLAB file. [WWW document]. 
%       URL http://www.mathworks.com/matlabcentral/fileexchange/loadFile.do?objectId=5576

    DS=[{'Repeated Measures ANOVA p-values'},{'_'},{'_'}];
    DS=[DS;[{'Variable'},{'Subject Effect'},{'Time Effect'}]];
    Psubject=[];    Ptreatment=[];
    Ptime=[];       Pinteraction=[];
    for i=1:length(Bins2);
        X=[USE2(:,i),T+2,fixB];
        [pS,pT] = RMAOV1_mvr(X,0.05);
        DS=[DS;[Bins2(i),num2cell(pS),num2cell(pT)]]; 
        Psubject=[Psubject;pS];    
        Ptime=[Ptime;pT];                     
    end    
    xlswrite('Repeated Measures ANOVA Vehicle.xlsx', DS, 'P-values', 'A1'); 

%-------------------------------------------------------------------------- 
% ASCA 
%-------------------------------------------------------------------------- 
% The asca function performs principal component analysis on the 
% level averages of each factor, as provided by:
%   Gooitzen Zwanenburg (Copyright)
%   This code is available under APACHE Licence 2.0
%   http://www.apache.org/licenses/LICENSE-2.0.html

    ASCA_V = asca(USE3, [fixB,T+2],[], 1);   
    close all;
    
    % ASCA "VIPs"
    % Sum of squared loadings
        loads=ASCA_V.factors.loadings{2,1};    % TIME FACTOR 
        SSQL=sum((loads(:,1:2).^2)');   
        eigvals=ASCA_V.factors.singular{2,1}; 
        VarExpl = eigvals./sum(eigvals);    
        DS=[{'Variable'},{'Sum of Squared Loadings for First 2 LVs'}];
        DS=[DS;[Bins2,num2cell(SSQL)']];
        xlswrite('VIP ASCA TIME FACTOR FOR VEHICLE.xlsx', DS, 'Variable SSQL List', 'A1');
            
%-------------------------------------------------------------------------- 
% PCA UNFOLDED 
%-------------------------------------------------------------------------- 
    % UNFOLDING - NB MUST BE ORDERED BY SUBJECT             
        unfold=[]; 
        unfold=[unfold,USE3(T==-1,:)];
        unfold=[unfold,USE3(T==0,:)];
        unfold=[unfold,USE3(T==1,:)];
        unfold=[unfold,USE3(T==2,:)];
        unfold=[unfold,USE3(T==3,:)];
        unfold=[unfold,USE3(T==4,:)];

    % PCA 
    % Perform PCA using the PLS Toolbox
        options  = pca('options'); 
        options.preprocessing = {[] []};     
        modelpca = pca(unfold,2);  
        loadings = modelpca.loads{2,1}; 
        scores   = modelpca.loads{1,1};  
        eigvals  = modelpca.detail.ssq(:,3); 
        VarExpl  = eigvals./sum(eigvals);
        close all;
